# Supplementary material for: Asymptomatic Construct Failure after Metastatic Spine Tumor Surgery: A New Entity or a Continuum with Symptomatic Failure?
Source: PubMed Central journal article supplement — Asian Spine J. 2020 Oct 29;15(5):636–49. doi: 10.31616/asj.2020.0167 (PMC8561154; doi:10.31616/asj.2020.0167), 2020-10-29
Supplement: asj-2020-0167-suppl.pdf [file asj-2020-0167-suppl.pdf]

**Supplemental Table 1.** Mechanisms of failure

| Mechanism of failure   | Definitions                                                                                                      |
|------------------------|------------------------------------------------------------------------------------------------------------------|
| Screw ploughing        | Translation of pedicle screw perpendicular to its long axis (sagittal/coronal)                                   |
| Screw loosening        | Radiolucent halo around the screw of 1 mm or more                                                                |
| Screw pull-out         | Translation of pedicle screw parallel to its long axis                                                           |
| Screw cut-out          | Continued ploughing leading to disruption of end plate/pedicle walls/vertebral body                              |
| Screw/rod breakage     | Fracture of screw/rod anywhere along its entire length                                                           |
| Cage subsidence        | Sinking in of the cage along its vertical axis from the original position which can be discerned radiologically  |
| Cage displacement      | Anteroposterior or mediolateral displacement or tilting of cage                                                  |
| Cage breakage          | Fracture or disengagement of cage seen on radiographs                                                            |
| Angular deformity      | Increase or decrease in the sagittal angulation of the end vertebrae of the construct                            |
| Peri-construct failure | Tumor progression or skeletal fractures in the subjacent levels that require revision or extension of constructs |

From Kumar et al. *Eur Spine J* 2018;27:806-14 [7], with permission of Springer Nature.
